# Supplementary material for: iRhom2 promotes lupus nephritis through TNF-α and EGFR signaling
Source: JCI journal article supplement (doi:10.1172/jci97650), 2018-01-25
Supplement: sd1 [file 1]

SUPPLEMENTAL FIGURES

Sup. Figure 1

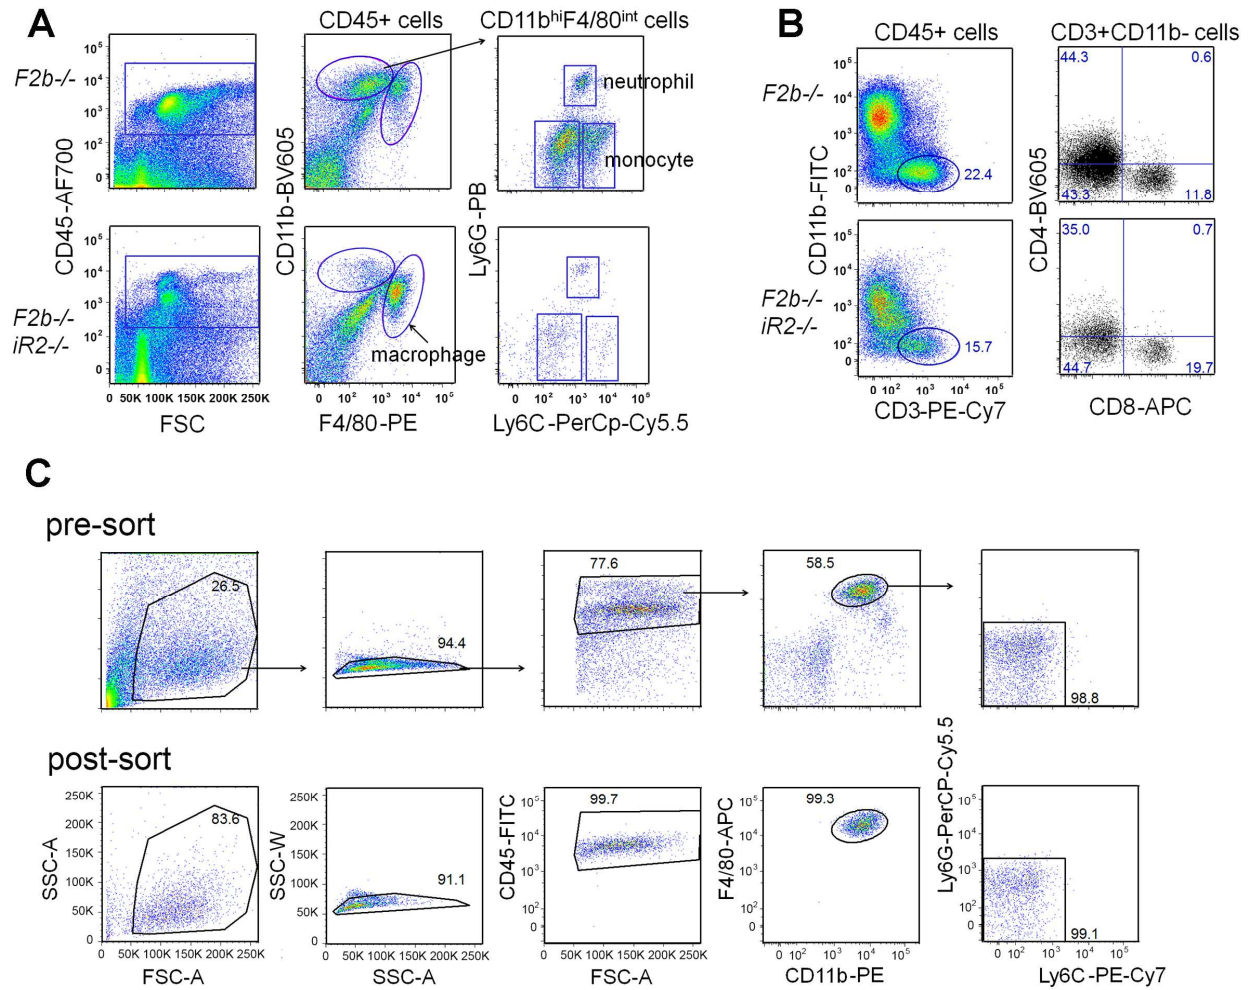

**Supplemental figure 1. Flow cytometry gating and sorting strategies.** (A and B) Gating strategy for flow cytometry analysis of inflammatory cell infiltrates in the kidneys. (A) CD45<sup>+</sup> leukocytes, CD45<sup>+</sup>F4/80<sup>hi</sup>CD11b<sup>+</sup> macrophages, CD45<sup>+</sup>F4/80<sup>int</sup>CD11b<sup>hi</sup>Ly6C<sup>+</sup>Ly6G<sup>+</sup> neutrophils, CD45<sup>+</sup>F4/80<sup>int</sup>CD11b<sup>hi</sup>Ly6C<sup>hi</sup>Ly6G<sup>-</sup> Ly6C<sup>hi</sup> monocytes. (B) T cell subsets (CD45<sup>+</sup>CD11b<sup>-</sup>CD3<sup>+</sup> total T cells, CD45<sup>+</sup>CD11b<sup>-</sup>CD3<sup>+</sup> CD4<sup>+</sup>CD8<sup>-</sup> T cells, CD45<sup>+</sup>CD11b<sup>-</sup>CD3<sup>+</sup>CD4<sup>-</sup>CD8<sup>+</sup> T cells, and CD45<sup>+</sup>CD11b<sup>-</sup>CD3<sup>+</sup>CD4<sup>-</sup>CD8<sup>-</sup> double negative T cells). (C) Sorting macrophages from kidneys for RNA-seq. Macrophages were sorted as CD45<sup>+</sup>F4/80<sup>hi</sup>CD11b<sup>+</sup>Ly6G<sup>-</sup>Ly6C<sup>-</sup> population in perfused kidneys for RNA-seq.

## Sup. Figure 2

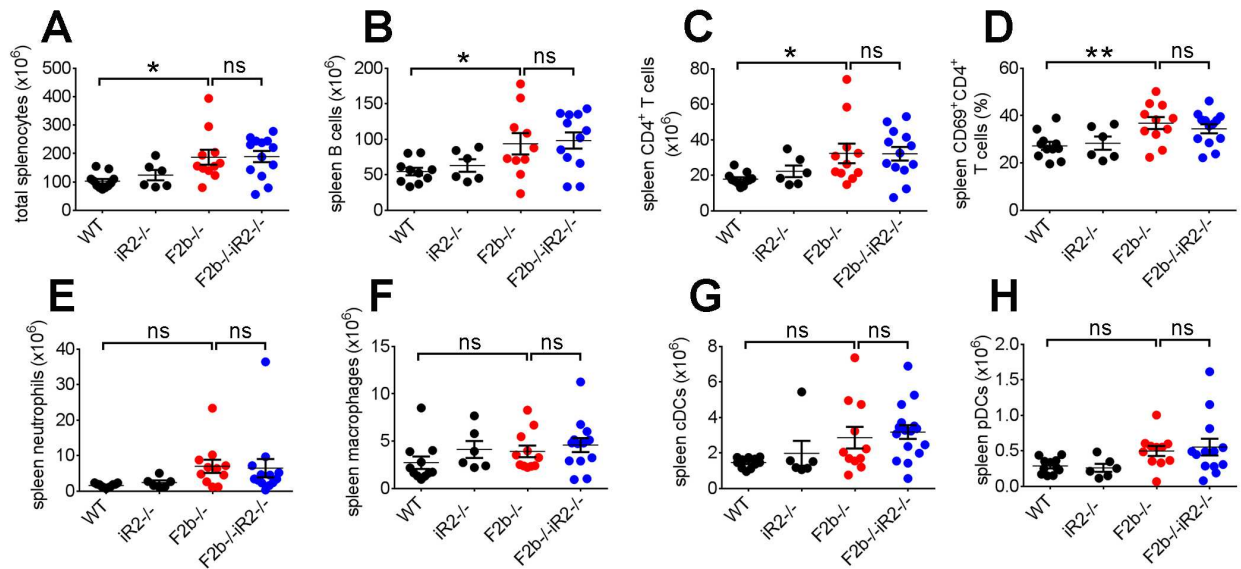

**Supplemental Figure 2. Expansion of immune cells in the spleen of *Fcgr2b*<sup>-/-</sup> mice was not affected by *iRhom2* deficiency.** Spleen cells from 7-9 month old mice were assessed by flow cytometry. (A) Numbers of total splenocytes. (B) Numbers of CD11b<sup>-</sup>CD3<sup>+</sup>B220<sup>+</sup>CD4<sup>-</sup> B cells. (C) CD11b<sup>-</sup>CD3<sup>+</sup>B220<sup>-</sup>CD4<sup>+</sup> T cells. (D) Percentage of CD69<sup>+</sup> activated CD4<sup>+</sup> T cells. (E) Numbers of CD11b<sup>hi</sup>Ly6G<sup>+</sup> neutrophils. (F) F4/80<sup>hi</sup>CD11b<sup>+</sup> macrophages. (G) CD11c<sup>hi</sup>MHCclassII<sup>+</sup>PDCA<sup>-</sup> conventional dendritic cells (cDCs). (H) CD11c<sup>lo</sup>PDCA<sup>+</sup> plasmacytoid dendritic cells (pDCs). A-H, 11 *WT*, 6 *Rhbd2*<sup>-/-</sup>, 11 *Fcgr2b*<sup>-/-</sup>, and 13 *Fcgr2b*<sup>-/-</sup>*Rhbd2*<sup>-/-</sup> mice. All are mean ± s.e.m, One-way ANOVA with Dunnett's multiple comparisons test. \* *P*<0.05, \*\* *P*<0.01, ns, not significant.

# Sup. Figure 3

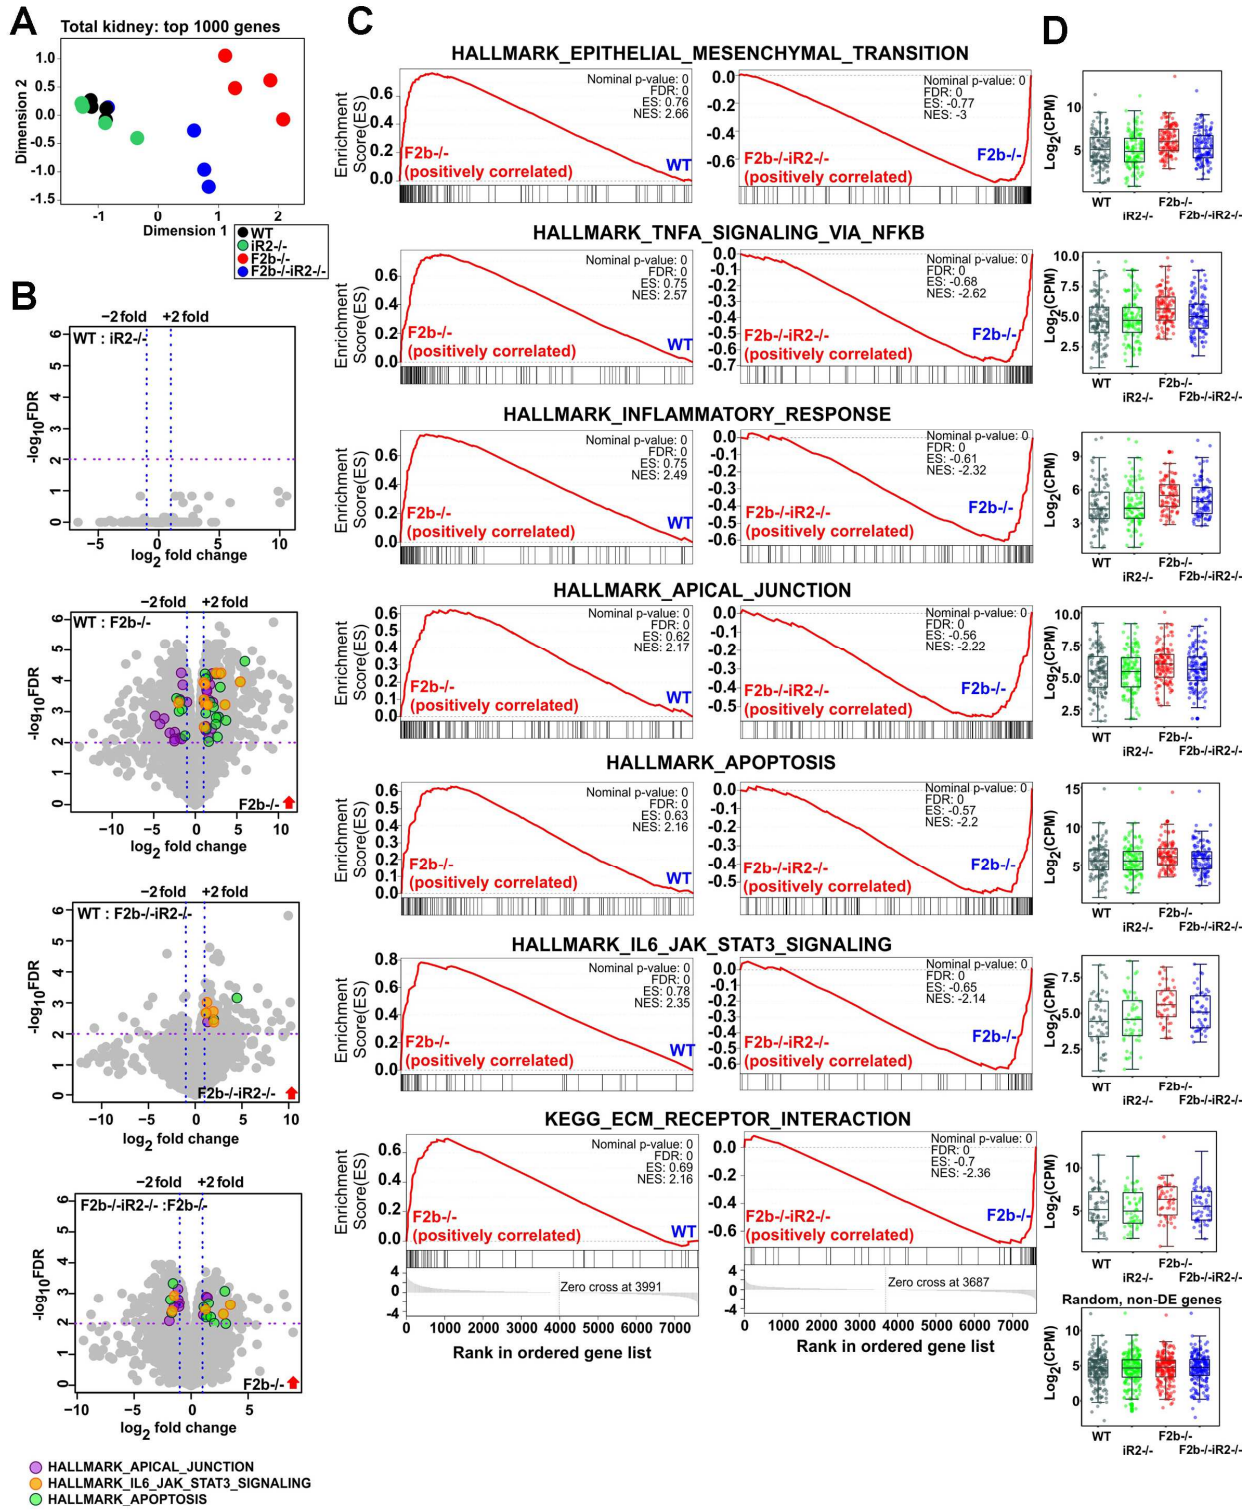

**Supplemental figure 3. RNA-seq profiling of mouse kidneys.** (A) Multidimensional scaling plot for the top 1000 genes with the largest expression variance identified by RNA-seq. (B-D) GSEA of RNA-seq data. (B) Differentially expressed genes that belonged to the hallmark gene sets in *Fcrg2b*<sup>-/-</sup> vs. WT mice were highlighted in the volcano plots. (C) GSEA profiles for the top hallmark gene sets are shown for *Fcrg2b*<sup>-/-</sup> vs. WT (left panels) and *Fcrg2b*<sup>-/-</sup> vs. *Fcrg2b*<sup>-/-</sup> *Rhbd2*<sup>-/-</sup> kidneys (right panels). FDR, False discovery rate. ES, Enrichment score. NES, Normalized enrichment score. (D) Expression of genes from hallmark gene sets is illustrated for all 4 groups of mice. A set of random non-differentially expressed genes (*n*=200) were shown as control on the bottom. (*n*=4 mice per group)



## Sup. Figure 4

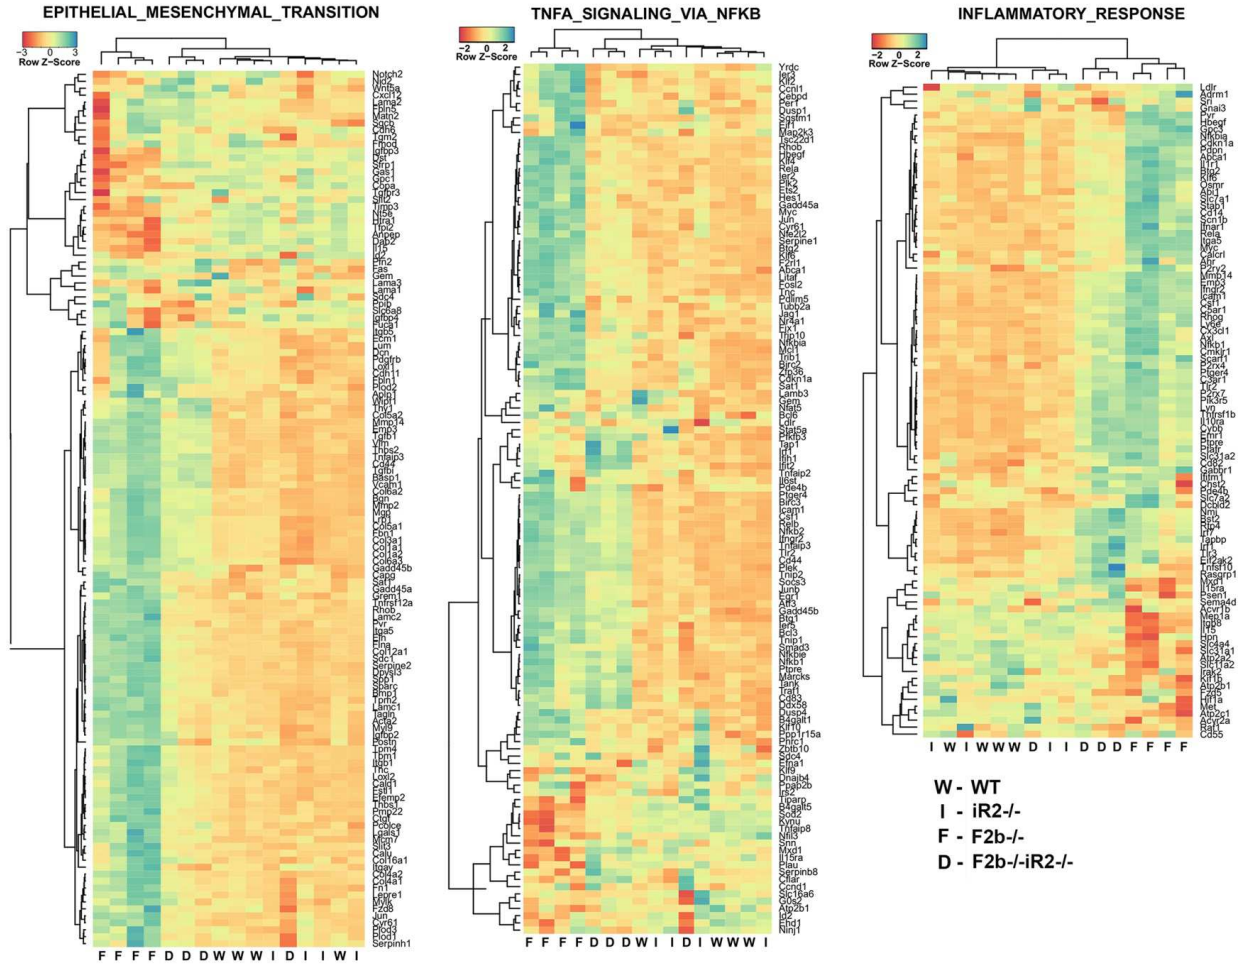

**Supplemental figure 4. Hierarchical clustering of genes from the EMT, TNF signaling and inflammatory response gene sets in mouse kidneys.** GSEA of RNA-seq data from lupus kidneys identified the EMT, TNF signaling and inflammatory response as the top 3 hallmark gene sets differentially expressed between *Fcrg2b*<sup>-/-</sup> vs. WT mice. Unsupervised hierarchical clustering indicates substantial upregulation of genes from these gene sets in *Fcrg2b*<sup>-/-</sup> compared to other genotypes ( $n=4$  mice per group).

## Sup. Figure 5

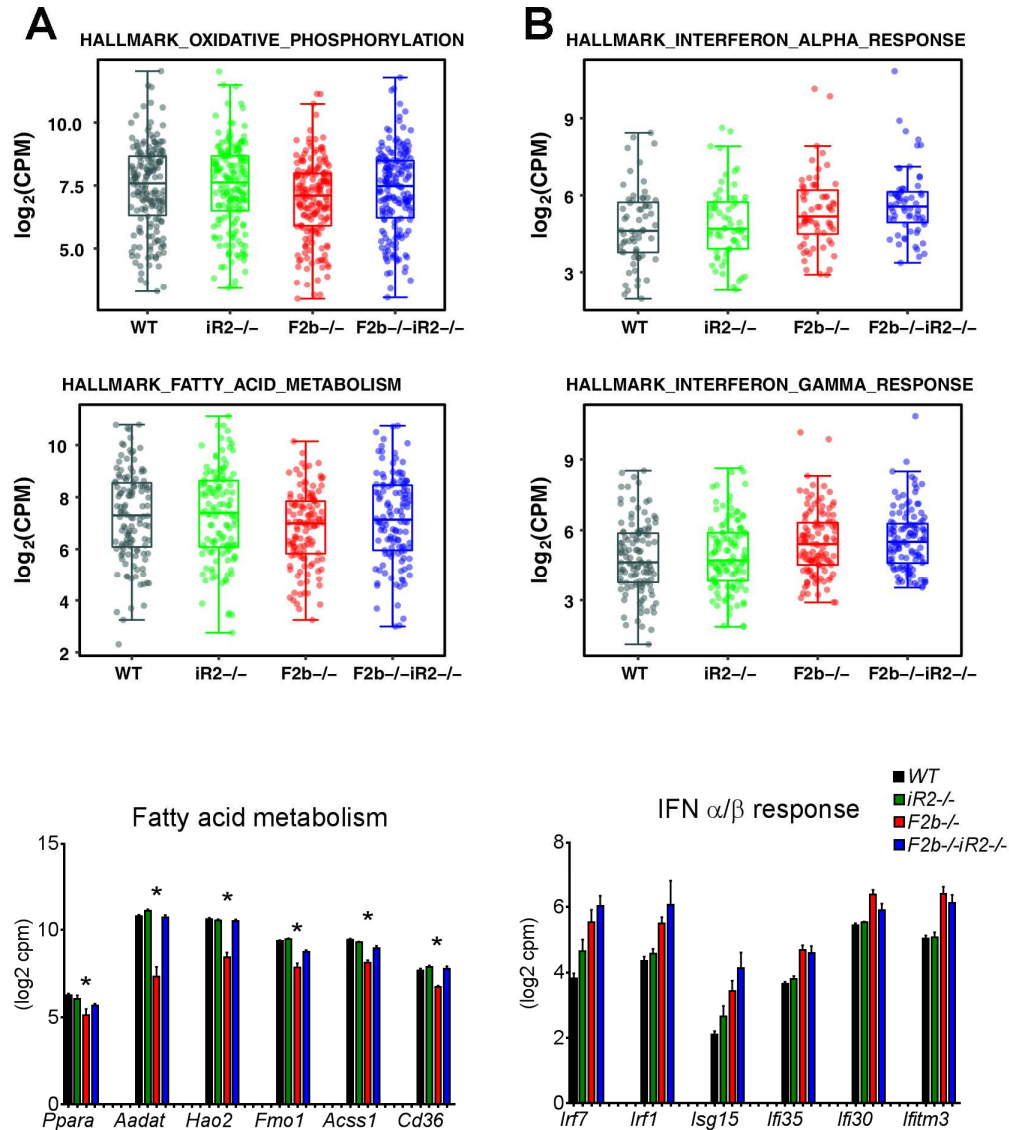

**Supplemental figure 5. Fatty acid metabolism and IFN responses in the kidneys of *Fcrg2b*<sup>-/-</sup> mice.** GSEA was performed on RNA-seq results from total kidneys. Expression of gene sets encoding oxidative phosphorylation, fatty acid metabolism (A) and IFN $\alpha$ , IFN $\gamma$  responses (B) was illustrated. Representative genes shown: *Ppara*, peroxisome proliferative activated receptor, alpha; *Aadat*, amino adipate aminotransferase; *Hao2*, hydroxyacid oxidase 2 (long chain); *Fmo1*, flavin containing monooxygenase 1; *Acsc1*, acyl-CoA synthetase short-chain family member 1; *Cd36*, thrombospondin receptor; *Irf7*, interferon regulatory factor 7; *Irf1*, interferon regulatory factor 1; *Isg15*, ISG15 ubiquitin-like modifier; *Ifi35*, interferon-induced protein 35; *Ifi30*, interferon-induced protein 30; *Ifitm3*, interferon induced transmembrane protein 3.  $n=4$  mice per group. \*  $P<0.05$

Sup. Figure 6

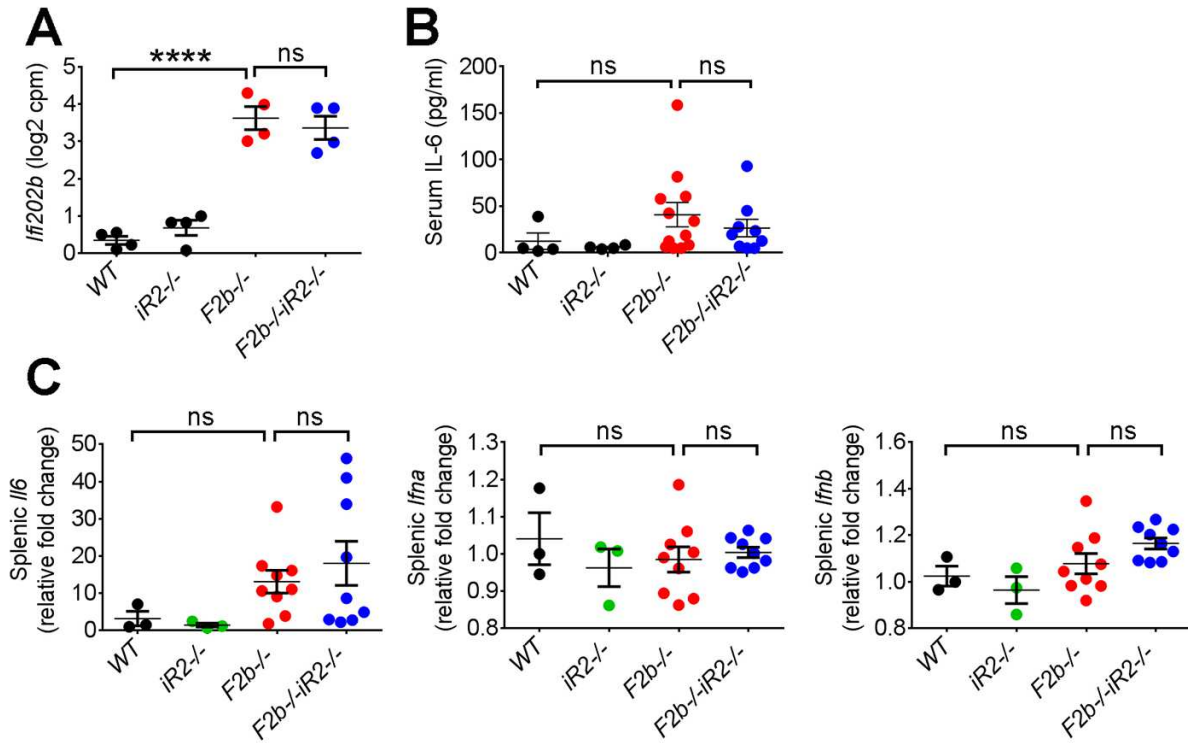

**Supplemental Figure 6. Type I IFN induced genes and serum IL-6 are not altered by *iRhom2* deficiency in *Fcgr2b*<sup>-/-</sup> mice.** (A) Expression of *Ifi202b* in the kidneys on RNA-seq. *n*=4 mice per group, mean ± s.e.m. (B) IL-6 was measured by ELISA in the serum of WT (*n*=4), *Rhbd2*<sup>-/-</sup> (*n*=4), *Fcgr2b*<sup>-/-</sup> (*n*=12) and *Fcgr2b*<sup>-/-</sup>*Rhbd2*<sup>-/-</sup> mice (*n*=10) at the age of 7-9 months upon euthanasia. (C) Expression of *Il6*, *Ifna*, and *Ifnb* mRNA in the spleen measured by qPCR. 3 WT, 3 *Rhbd2*<sup>-/-</sup>, 9 *Fcgr2b*<sup>-/-</sup> and 9 *Fcgr2b*<sup>-/-</sup>*Rhbd2*<sup>-/-</sup> mice. Mean ± s.e.m. (B and C) One-way ANOVA with Dunnett's multiple comparisons test. \*\*\*\* *P*<0.0001, ns, not significant.



# Sup. Figure 7

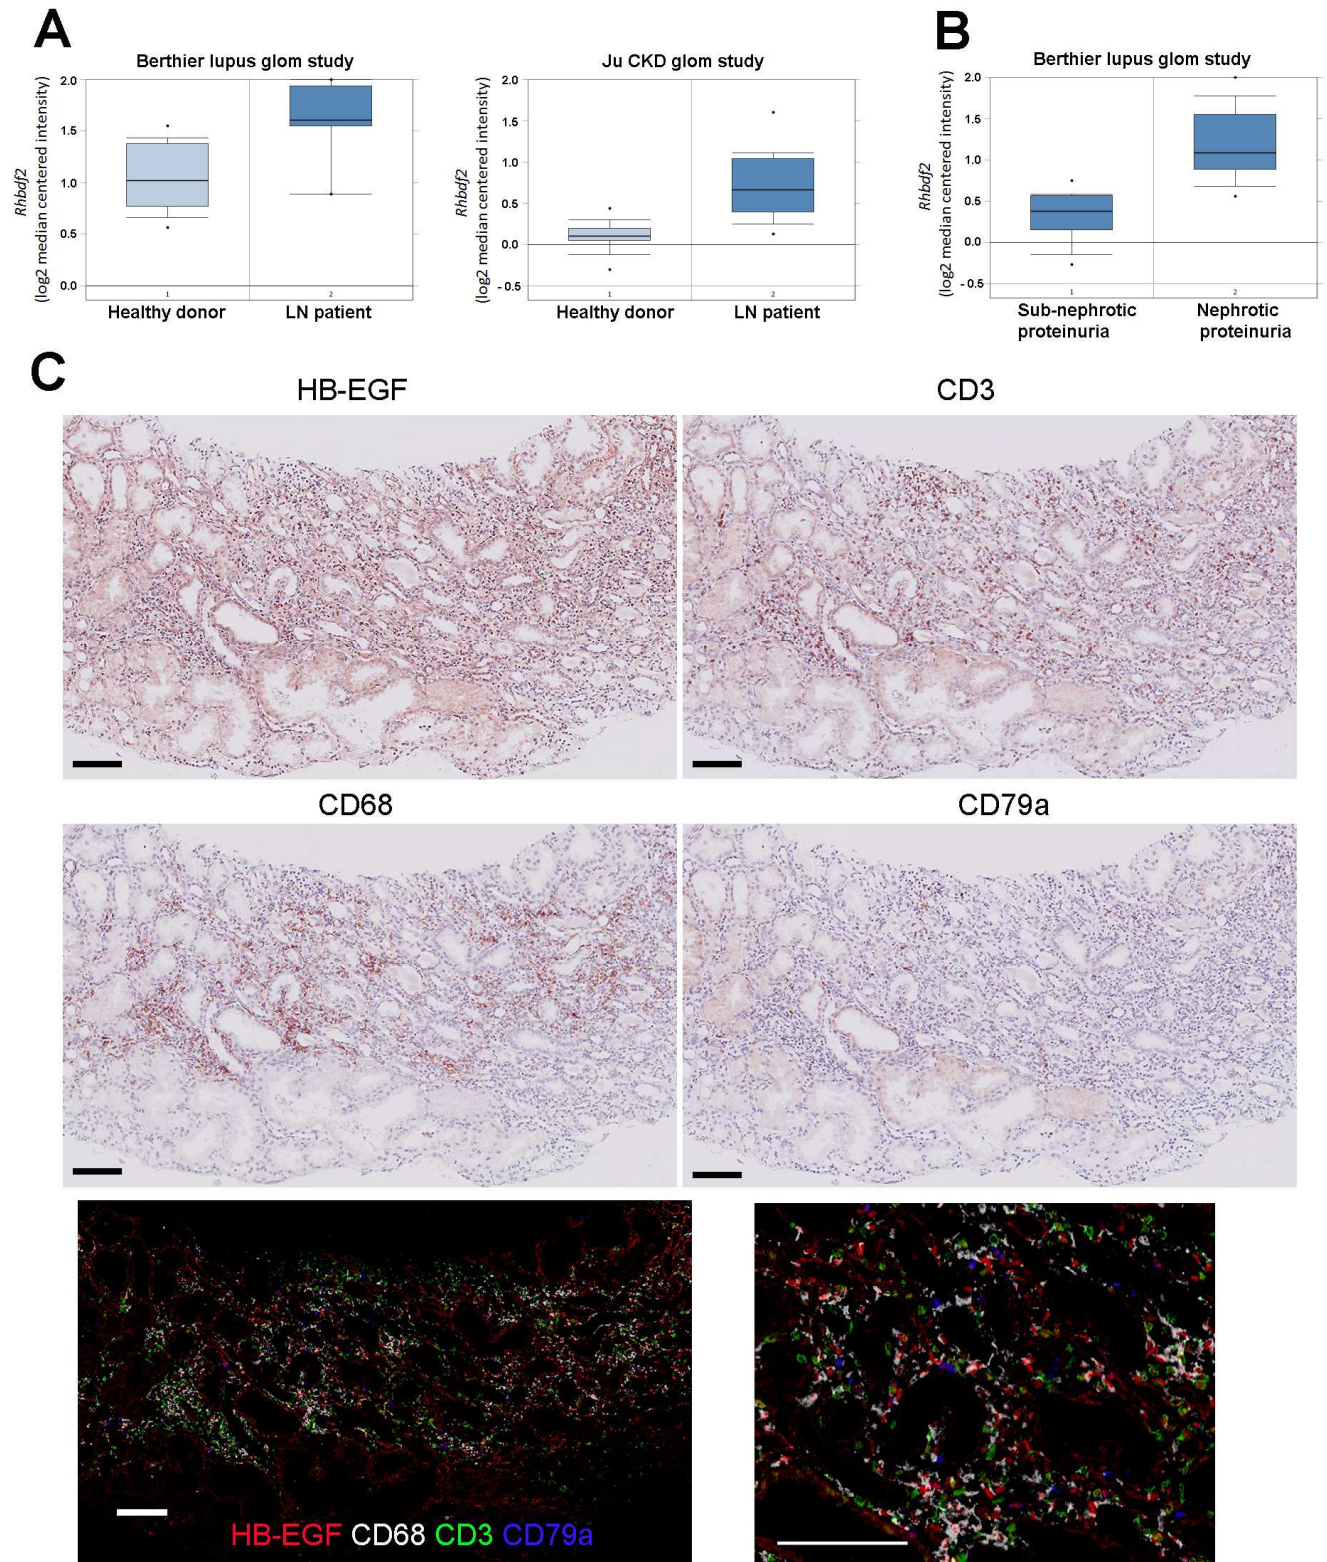



**Supplemental figure 7. *Rhbdf2* and HB-EGF are over-expressed in the kidneys of LN patients.** (A and B) Expression of *Rhbdf2* in kidneys of LN patients measured by cDNA microarray. (A) Healthy donors vs. LN patients. Berthier lupus glom study, 14 healthy donor and 32 LN patients, mean  $\pm$  s.d., fold change=1.813,  $P=6.00E-10$  (35) (GSE32591); Ju CKD glom study, 21 healthy donor and 32 LN patients, mean  $\pm$  s.d., fold change=1.532,  $P=2.99E-10$  (34). (B) Patients with sub-nephrotic proteinuria vs. patients with nephrotic proteinuria. Berthier lupus glom study, 18 patients with sub-nephrotic proteinuria and 9 patients with nephrotic proteinuria, fold change=1.518,  $P=2.69E-10$  (35) (GSE32591). (C) Sequential staining of HB-EGF (red signal) and leukocytes in the kidney interstitium of LN patients. CD68 (white signal) for macrophages, CD3 (green signal) for T cells and CD79a (blues signal) for B cells. Scale bar, 100  $\mu$ m. Representative image from 24 LN patients (18 class IV and 6 class V). This data is also shown in Figure 10B.

## Sup. Figure 8

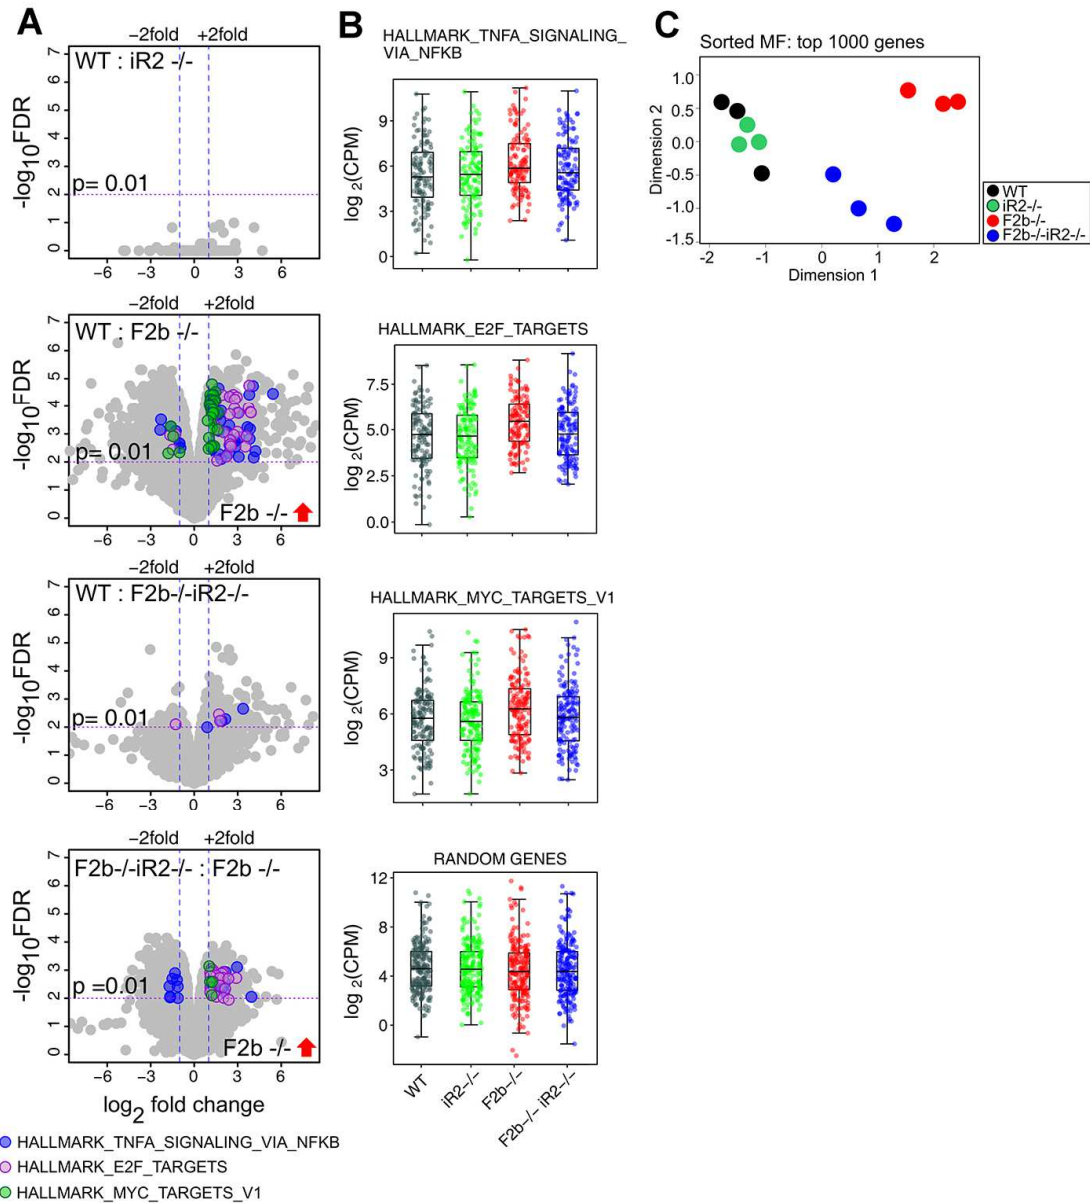

**Supplemental figure 8. RNA-seq analysis of kidney macrophages from *Fcgr2b*<sup>-/-</sup> mice. (A)** Volcano plots of genes differentially expressed between each group ( $P=0.01$ ,  $FC=2$ ). Differentially-expressed genes that belong to the enriched hallmark gene sets identified by GSEA are shown in indicated colors. **(B)** Expression of genes from TNF signaling, E2F targets and Myc targets gene sets. A set of random non-differentially expressed genes ( $n=200$ ) is shown as control. **(C)** Multidimensional scaling plot for the top 1000 genes with the largest expression variance identified by RNA-seq.

## Sup. Figure 9

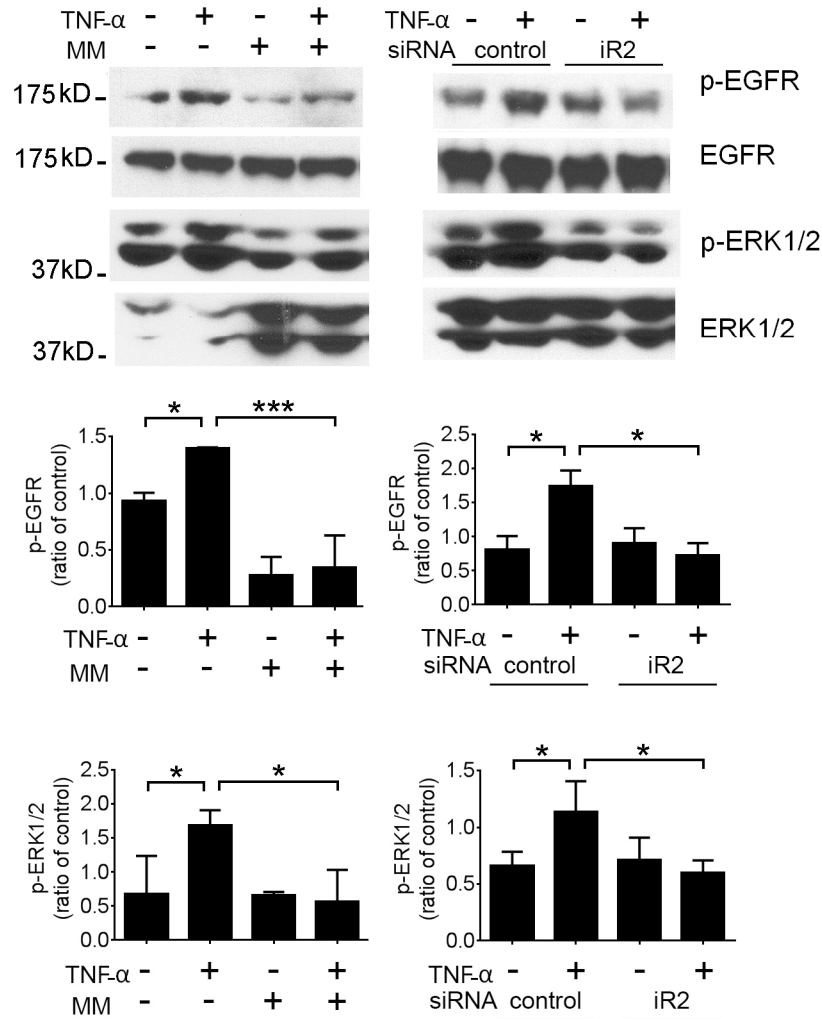

**Supplemental figure 9. TNF- $\alpha$  transactivates EGFR via the iRhom2/ADAM17 pathway in kidney tubular epithelial cells.** C1 cells pretreated with MM or transfected with siRNA were stimulated with mouse recombinant TNF- $\alpha$ . Expression of p-EGFR, EGFR, p-ERK1/2 and ERK1/2 was assessed in cell lysates. The p-EGFR/EGFR and p-ERK1/2/ERK bands in the siRNA experiments shown here are replicate samples run on parallel gels. P-EGFR and p-ERK1/2 expression was calculated as ratios against total EGFR or ERK1/2 respectively. n=3 independent experiments, mean  $\pm$  s.e.m. One-way ANOVA with Dunnett's multiple comparisons test. \*  $P < 0.05$ , \*\*\*  $P < 0.001$ .

## Sup. Figure 10

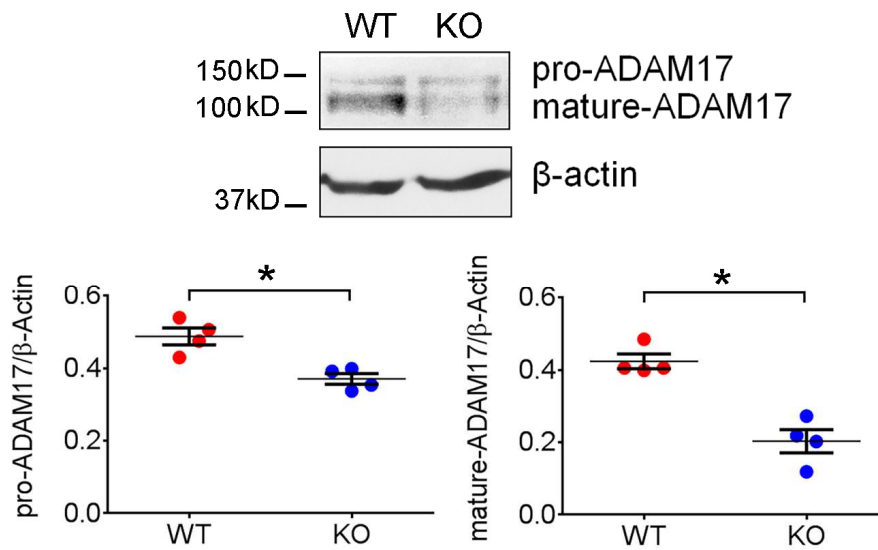

**Supplemental figure 10. Decreased ADAM17 expression in the nephrons of *iRhom2* deficient mice.** Nephrons (glomeruli and tubules) isolated from *Rhbd2*<sup>-/-</sup> and WT mice were examined for ADAM17 expression (pro- and mature forms). n=4 mice per group,  $\beta$ -actin ratio as loading control, mean  $\pm$  s.e.m. two-tailed Mann-Whitney test. \*  $P < 0.05$ .



**Supplemental Table 1. Demographics of patients with kidney biopsies**

| <b>Diagnosis</b>              | <b>Kidney biopsies (n)</b> | <b>Age (Years, Mean <math>\pm</math> SD)</b> | <b>Female (n)</b> | <b>Male (n)</b> |
|-------------------------------|----------------------------|----------------------------------------------|-------------------|-----------------|
| LN class IV with crescents    | 9                          | 39 $\pm$ 16                                  | 7                 | 2               |
| LN class IV without crescents | 9                          | 35 $\pm$ 17                                  | 5                 | 4               |
| LN class V                    | 6                          | 44 $\pm$ 15                                  | 4                 | 2               |
| ANCA associated vasculitis    | 10                         | 56 $\pm$ 18                                  | 4                 | 6               |
